# Supplementary material
Source: Springer Nature journal article supplement (https://mijn.bsl.nl/resource/supplementary/13047_2011_484_MOESM3_ESM.pdf/7473920)
Supplement: MOESM3 [file 7473920]

Patient requires treatment, referred for assessment of eligibility  
(n=127)

Excluded (n=0)  
Refused to participate (n=5)

Assessed for eligibility  
(n=122)

Excluded (n=0)  
Not meeting criteria (n=3)  
Refused to participate (n=0)

Randomised (n=119)

Allocated to intervention (n=60)  
Custom-made functional insole

Allocated to intervention (n=59)  
Prefabricated insole

Demographic data collected

Received intervention (n= 56)  
1 died  
1 moved from area  
1 fell and hospitalised long term  
1 withdrew from the study

Received intervention (n=57)  
1 died  
1 amputation of lower extremity

Completing 6-month follow up  
(n=53)  
Lost to follow-up (n=3)  
2 withdrew from study  
1 did not attend follow up

Completing 6-month follow up  
(n=51)  
Lost to follow-up (n=6)  
1 died  
1 hospitalised terminal illness  
1 housebound at follow up  
2 withdrew from study  
1 did not attend follow up

6 month follow up primary end point (n=104)  
kinetic data unavailable (n=8)
